# Supplementary material for: Histopathologic and clinicopathologic classifications of antineutrophil cytoplasmic antibody-associated glomerulonephritis: a validation study in a Korean cohort
Source: PubMed Central journal article supplement — Kidney Res Clin Pract. 2021 Feb 21;40(1):77–88. doi: 10.23876/j.krcp.20.184 (PMC8041633; doi:10.23876/j.krcp.20.184), 2021-02-21
Supplement: j-krcp-20-184suppl.pdf [file j-krcp-20-184suppl.pdf]

## Supplementary material

**Supplementary Table 1.** The association between histopathologic findings reflecting active lesions and progression to end-stage kidney disease

| Variable                            | aHR (95% CI)     | p-value |
|-------------------------------------|------------------|---------|
| Glomerular fibrinoid necrosis       | 0.87 (0.41–1.85) | 0.715   |
| Moderate to severe ptc ( $\geq 2$ ) | 0.76 (0.38–1.52) | 0.435   |
| Moderate to severe t ( $\geq 2$ )   | 0.69 (0.46–1.04) | 0.078   |
| Moderate to severe i ( $\geq 2$ )   | 2.40 (1.09–5.31) | 0.031   |

Adjusted hazard ratios (aHRs) and 95% confidence interval (CI) of each variable were obtained by separate Cox proportional hazard models after adjustment for age, sex, and comorbid hypertension.

Peritubular capillaritis (ptc): 0, no significant cortical peritubular capillaritis, or  $<10\%$  of peritubular capillaries with inflammation; 1,  $\geq 10\%$  of cortical peritubular capillaries with capillaritis, with max 3 to 4 luminal inflammatory cells; 2,  $\geq 10\%$  of cortical peritubular capillaries with capillaritis, with max 5 to 10 luminal inflammatory cells; 3,  $\geq 10\%$  of cortical peritubular capillaries with capillaritis, with max  $>10$  luminal inflammatory cells. Tubulitis (t): 0, no mononuclear cells in tubules; 1, foci with 1–4 cells/tubular cross section (or 10 tubular cells); 2, foci with 5 to 10 cells/tubular cross section; 3, foci with 10 cells/tubular cross section. Interstitial inflammation (i): 0, no or trivial interstitial inflammation ( $<10\%$  of unscarred parenchyma); 1, 10%–25% of parenchyma inflamed; 2, 26%–50% of parenchyma inflamed; 3, 50% of parenchyma inflamed.
